# Supplementary material for: Effects of Three Semen Extenders, Breeding Season Month and Freezing–Thawing Cycle on Spermatozoa Preservation of Portuguese Merino Sheep
Source: MDPI journal article supplement (doi:10.3390/ani11092619), 2021-09-07
Supplement: s1 [file s1]

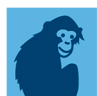**Table S1.** Effects of semen extender, month and thawing according to their interactions on the percentage of individual motility (IM), viability (Alive) and morphology of spermatozoa.

| S-EXT      | Month | SP     | Spermatozoa (%)       |                           |                     |                     |                             |                              |                                    |                                  |
|------------|-------|--------|-----------------------|---------------------------|---------------------|---------------------|-----------------------------|------------------------------|------------------------------------|----------------------------------|
|            |       |        | Alive                 | Death                     | IM                  | Normal              | Abnormal                    | Head                         | MP                                 | Tail                             |
| EZN        | Nov   | Fresh  | 61.2 <sup>a</sup>     | 37.9 <sup>g,h</sup>       | 66.2 <sup>a</sup>   | 78.5 <sup>a</sup>   | 19.5 <sup>a</sup>           | 1.1 <sup>b,c,d,e,f,g,h</sup> | 6.0 <sup>a,b,c,d,e,f,h,i,j</sup>   | 9.3 <sup>a,b</sup>               |
|            |       | Thawed | 33.1 <sup>c,d</sup>   | 66.3 <sup>b,c,d</sup>     | 35.1 <sup>b</sup>   | 89.5 <sup>a,b</sup> | 10.0 <sup>b,c,d,e,f</sup>   | 0.7 <sup>b,c,d,e,f,g,h</sup> | 2.1 <sup>f,g,h,i,j,k,l</sup>       | 6.9 <sup>a,b,c,d,f,g,i</sup>     |
|            | Dec.  | Fresh  | 67.4 <sup>a</sup>     | 31.6 <sup>h</sup>         | 63.7 <sup>a</sup>   | 83.7 <sup>a,b</sup> | 14.9 <sup>a,b,c,d</sup>     | 0.9 <sup>b,c,d,e,f,g,h</sup> | 7.7 <sup>a,b,c,d,e</sup>           | 4.9 <sup>c,d,e,f,g,h,i,j,k</sup> |
|            |       | Thawed | 33.4 <sup>c,d</sup>   | 73.0 <sup>a,b,c</sup>     | 37.7 <sup>b</sup>   | 60.3 <sup>c</sup>   | 8.2 <sup>d,e,f</sup>        | 0.9 <sup>b,c,d,e,f,g,h</sup> | 0.5 <sup>l</sup>                   | 9.5 <sup>a,b</sup>               |
|            | April | Fresh  | 53.9 <sup>a</sup>     | 45.8 <sup>e,g</sup>       | 62.5 <sup>a</sup>   | 82.9 <sup>a,b</sup> | 16.7 <sup>a,b,c</sup>       | 1.1 <sup>b,c,d,e,f,g,h</sup> | 7.5 <sup>a,b,c,d,e</sup>           | 7.7 <sup>a,b,c,f,g</sup>         |
|            |       | Thawed | 19.6 <sup>e,f</sup>   | 79.9 <sup>a,b,c</sup>     | 38.0 <sup>b</sup>   | 87.9 <sup>a,b</sup> | 8.8 <sup>d,e,f</sup>        | 3.6 <sup>a</sup>             | 1.4 <sup>g,k,l</sup>               | 3.4 <sup>e,h,j,k,l</sup>         |
|            | May   | Fresh  | 63.9 <sup>a</sup>     | 35.2 <sup>g,h</sup>       | 63.7 <sup>a</sup>   | 87.4 <sup>a,b</sup> | 11.7 <sup>a,b,c,d,e,f</sup> | 0.5 <sup>e,f,g,h</sup>       | 6.2 <sup>a,b,c,d,e,h,i</sup>       | 4.3 <sup>d,e,h,i,j,k,l</sup>     |
|            |       | Thawed | 36.0 <sup>b,c,d</sup> | 63.6 <sup>b,c,d,f</sup>   | 39.5 <sup>b</sup>   | 93.7 <sup>b</sup>   | 6.0 <sup>e,f</sup>          | 0.9 <sup>b,c,d,e,f,g,h</sup> | 0.9 <sup>k,l</sup>                 | 3.0 <sup>h,j,k,l</sup>           |
| ANDR       | Nov   | Fresh  | 58.0 <sup>a</sup>     | 36.9 <sup>g,h</sup>       | 70.0 <sup>a</sup>   | 91.5 <sup>a,b</sup> | 8.5 <sup>b,c,d,e,f</sup>    | 1.4 <sup>a,b,c,d,e</sup>     | 3.0 <sup>b,d,e,f,g,h,i,j,k,l</sup> | 3.9 <sup>f,h,i,j,k,l</sup>       |
|            |       | Thawed | 27.7 <sup>d,e</sup>   | 70.2 <sup>b,c</sup>       | 13.6 <sup>c,d</sup> | 90.7 <sup>a,b</sup> | 9.2 <sup>a,b,c,d,e,f</sup>  | 0.9 <sup>c,e,f,g,h</sup>     | 1.5 <sup>h,i,j,k,l</sup>           | 6.4 <sup>a,b,c,d,f,g,h,j</sup>   |
|            | Dec   | Fresh  | 59.9 <sup>a</sup>     | 39.2 <sup>g,h</sup>       | 65.0 <sup>a</sup>   | 83.8 <sup>a,b</sup> | 12.9 <sup>a,b,c,d,e,f</sup> | 0.6 <sup>e,f,g,h</sup>       | 8.6 <sup>a,c</sup>                 | 2.7 <sup>i,k,l</sup>             |
|            |       | Thawed | 12.9 <sup>f,g</sup>   | 86.4 <sup>a,b,c</sup>     | 11.9 <sup>c,d</sup> | 89.0 <sup>a,b</sup> | 8.0 <sup>b,c,d,e,f</sup>    | 1.2 <sup>a,b,c,d,e,g</sup>   | 2.9 <sup>b,d,e,f,g,h,i,j,k,l</sup> | 6.5 <sup>a,b,c,d,f,g,h,j</sup>   |
|            | April | Fresh  | 49.5 <sup>a,b,c</sup> | 48.3 <sup>d,e,f,g,h</sup> | 63.7 <sup>a</sup>   | 85.1 <sup>a,b</sup> | 13.7 <sup>a,b,c,d,e</sup>   | 1.0 <sup>b,c,d,e,g</sup>     | 6.4 <sup>a,b,c,d,e,f,g</sup>       | 4.7 <sup>b,f,g,h,i,j,k</sup>     |
|            |       | Thawed | 12.2 <sup>f,g</sup>   | 87.5 <sup>a,b,c</sup>     | 18.2 <sup>c</sup>   | 87.2 <sup>a,b</sup> | 12.4 <sup>a,b,c,d,e,f</sup> | 2.8 <sup>a,b,d</sup>         | 1.5 <sup>h,i,j,k,l</sup>           | 6.9 <sup>a,b,c,d,e,f,g,h</sup>   |
|            | May   | Fresh  | 54.8 <sup>a,b</sup>   | 42.3 <sup>g,h</sup>       | 66.1 <sup>a</sup>   | 85.6 <sup>a,b</sup> | 13.3 <sup>a,b,c,d,e,f</sup> | 0.1 <sup>f,h</sup>           | 6.5 <sup>a,b,c,d,f,g</sup>         | 6.6 <sup>a,b,c,d,f,g,h,j</sup>   |
|            |       | Thawed | 5.9 <sup>g</sup>      | 92.3 <sup>a</sup>         | 4.4 <sup>e,f</sup>  | 88.2 <sup>a,b</sup> | 11.5 <sup>a,b,c,d,e,f</sup> | 0.4 <sup>e,f,g,h</sup>       | 1.9 <sup>e,h,i,j,k,l</sup>         | 8.4 <sup>a,c,d,e</sup>           |
| OVIX       | Nov.  | Fresh  | 63.2 <sup>a</sup>     | 36.6 <sup>g,h</sup>       | 65.0 <sup>a</sup>   | 82.5 <sup>a,b</sup> | 16.3 <sup>a,b,d</sup>       | 1.2 <sup>a,b,c,d,e</sup>     | 9.2 <sup>a,b</sup>                 | 4.4 <sup>a,b,c,d,f,g,h,i,j</sup> |
|            |       | Thawed | 21.7 <sup>d,e,f</sup> | 77.3 <sup>a,b,c</sup>     | 3.4 <sup>f</sup>    | 89.3 <sup>a,b</sup> | 10.8 <sup>a,b,c,d,e,f</sup> | 0.7 <sup>d,e,f,g,h</sup>     | 2.7 <sup>c,d,e,f,g,h,i,j,k,l</sup> | 6.1 <sup>a,b,c,d,e,f,h,i</sup>   |
|            | Dec.  | Fresh  | 56.5 <sup>a</sup>     | 43.0 <sup>f,g,h</sup>     | 56.2 <sup>a</sup>   | 86.1 <sup>a,b</sup> | 11.2 <sup>a,b,c,d,e</sup>   | 1.7 <sup>a,b,c,d,e</sup>     | 6.2 <sup>a,b,c,d,e,f,g,h</sup>     | 3.0 <sup>g,j,k,l</sup>           |
|            |       | Thawed | 13.2 <sup>f,g</sup>   | 82.5 <sup>a,b</sup>       | 8.2 <sup>d,e</sup>  | 91.7 <sup>a,b</sup> | 8.0 <sup>c,e,f</sup>        | 1.5 <sup>a,b,c,d,e</sup>     | 1.9 <sup>d,e,h,i,j,k,l</sup>       | 4.1 <sup>a,b,c,d,e,f,h,i,j</sup> |
|            | April | Fresh  | 55.8 <sup>a</sup>     | 43.7 <sup>f,g,h</sup>     | 55.9 <sup>a</sup>   | 87.1 <sup>a,b</sup> | 12.1 <sup>a,b,c,d,e</sup>   | 1.7 <sup>a,b,c,d,e</sup>     | 5.5 <sup>a,b,c,d,e,f,g,h,j</sup>   | 4.2 <sup>a,b,c,d,e,f,h,i,j</sup> |
|            |       | Thawed | 12.7 <sup>f,g</sup>   | 87.3 <sup>a,b</sup>       | 13.7 <sup>c,d</sup> | 91.4 <sup>a,b</sup> | 7.8 <sup>c,e,f</sup>        | 2.9 <sup>a,b,c</sup>         | 2.3 <sup>d,e,f,g,h,i,j,k,l</sup>   | 1.7 <sup>kl</sup>                |
|            | May   | Fresh  | 64.2 <sup>a</sup>     | 35.7 <sup>g,h</sup>       | 62.5 <sup>a</sup>   | 89.6 <sup>a,b</sup> | 8.8 <sup>b,c,d,e,f</sup>    | 0.1 <sup>g,h</sup>           | 5.1 <sup>a,b,c,d,e,f,g,h,j,k</sup> | 1.2 <sup>l</sup>                 |
|            |       | Thawed | 13.5 <sup>f,g</sup>   | 64.6 <sup>c,d,e</sup>     | 1.0 <sup>f</sup>    | 95.0 <sup>a,b</sup> | 5.0 <sup>f</sup>            | 0.7 <sup>d,e,f,g,h</sup>     | 1.2 <sup>k,l</sup>                 | 2.2 <sup>j,kl</sup>              |
| ±(Sqrt)SEM |       |        | ±0.27                 | ±0.28                     | ±0.17               | ±0.20               | ±0.28                       | ±0.17                        | ±0.27                              | ±0.21                            |

<sup>a-k</sup> different superscript letters in the same column:  $p < 0.05$ . S-EXT.: semen extender; SE- semen processing; EZN- dilutor used at Estação Zootécnica Nacional; OVIX- Ovixcell®; ANDR- Andromed®; MP – Middle piece. Highest and lowest averaged least square means in bold.

**Table S2.** Effects of semen extender, month and thawing according to their interactions on the percentage of total motility (TM), total motility progressive (TPM) and its subpopulations, and total static (TS) of spermatozoa (CASA).

| EXT  | Month      | SP     | Spermatozoa (%)       |                           |                           |                           |                                |                         |
|------|------------|--------|-----------------------|---------------------------|---------------------------|---------------------------|--------------------------------|-------------------------|
|      |            |        | TM                    | TS                        | TPM                       | Slow                      | Medium                         | Rapid                   |
| EZN  | Nov        | Fresh  | 82.4 <sup>a</sup>     | 12.8 <sup>e,f,g</sup>     | 36.0 <sup>a,b,c</sup>     | 4.9 <sup>c,d,e,f,g</sup>  | 4.7 <sup>d,e,f,g,h,i</sup>     | 67.5 <sup>a,b,c</sup>   |
|      |            | Thawed | 83.5 <sup>a</sup>     | 11.9 <sup>e,f,g</sup>     | 16.1 <sup>e,f</sup>       | 3.1 <sup>d,e,f,g,h</sup>  | 11.6 <sup>a,b,c,d</sup>        | 62.0 <sup>a,b,c,d</sup> |
|      | Dec        | Fresh  | 88.9 <sup>a</sup>     | 8.7 <sup>g</sup>          | 35.2 <sup>a,b,c</sup>     | 2.7 <sup>e,f,g,h</sup>    | 5.3 <sup>c,d,e,f,g,h,i</sup>   | 76.8 <sup>a</sup>       |
|      |            | Thawed | 75.2 <sup>a</sup>     | 20.5 <sup>e,f,g</sup>     | 14.8 <sup>f,g</sup>       | 8.0 <sup>a,b,c,d,e</sup>  | 16.7 <sup>a</sup>              | 45.1 <sup>c,d</sup>     |
|      | April      | Fresh  | 86.7 <sup>a</sup>     | 9.5 <sup>f,g</sup>        | 40.3 <sup>a</sup>         | 4.1 <sup>d,e,f,g,h</sup>  | 6.4 <sup>b,c,d,e,f,g,h</sup>   | 73.7 <sup>a,b</sup>     |
|      |            | Thawed | 64.3 <sup>a,b,c</sup> | 27.8 <sup>b,c,d,e</sup>   | 18.2 <sup>d,e,f</sup>     | 9.4 <sup>a,b,c,d,e</sup>  | 7.4 <sup>b,c,d,e,f,g</sup>     | 39.4 <sup>d,e</sup>     |
|      | May        | Fresh  | 82.2 <sup>a</sup>     | 14.1 <sup>e,f,g</sup>     | 39.2 <sup>a</sup>         | 1.5 <sup>f,g,h</sup>      | 3.1 <sup>f,g,h,i</sup>         | 74.4 <sup>a</sup>       |
|      |            | Thawed | 74.7 <sup>a</sup>     | 21.9 <sup>d,e,f,g</sup>   | 22.3 <sup>c,d,e,f</sup>   | 10.1 <sup>a,b,c,d,e</sup> | 12.2 <sup>a,b,c</sup>          | 46.7 <sup>b,c,d</sup>   |
|      | Nov        | Fresh  | 64.7 <sup>a,b</sup>   | 27.1 <sup>b,c,d,e</sup>   | 22.9 <sup>c,d,e,f</sup>   | 0.3 <sup>h</sup>          | 1.7 <sup>i</sup>               | 60.5 <sup>a,b,c,d</sup> |
|      |            | Thawed | 41.3 <sup>c,d,e</sup> | 54.9 <sup>a</sup>         | 6.6 <sup>g,h</sup>        | 13.3 <sup>a,b,c</sup>     | 13.5 <sup>a,b</sup>            | 12.8 <sup>f</sup>       |
| ANDR | Dec        | Fresh  | 69.6 <sup>a</sup>     | 24.0 <sup>c,d,e,f,g</sup> | 24.6 <sup>b,c,d,e,f</sup> | 0.9 <sup>f,g,h</sup>      | 3.8 <sup>e,f,g,h,i</sup>       | 63.2 <sup>a,b,c,d</sup> |
|      |            | Thawed | 45.3 <sup>b,c,d</sup> | 49.7 <sup>a,b</sup>       | 5.1 <sup>h</sup>          | 14.9 <sup>a,b</sup>       | 11.2 <sup>a,b,c,d</sup>        | 13.3 <sup>f</sup>       |
|      | April      | Fresh  | 72.3 <sup>a</sup>     | 24.2 <sup>c,d,e,f,g</sup> | 28.0 <sup>a,b,c,d,e</sup> | 4.3 <sup>d,e,f,g,h</sup>  | 6.3 <sup>b,c,d,e,f,g,h,i</sup> | 58.8 <sup>a,b,c,d</sup> |
|      |            | Thawed | 39.5 <sup>d,e</sup>   | 55.4 <sup>a</sup>         | 5.5 <sup>h</sup>          | 9.1 <sup>a,b,c,d,e</sup>  | 7.4 <sup>b,c,d,e,f,g</sup>     | 18.9 <sup>e,f</sup>     |
|      | May        | Fresh  | 71.0 <sup>a</sup>     | 24.1 <sup>c,d,e,f,g</sup> | 29.0 <sup>a,b,c,d,e</sup> | 1.4 <sup>f,g,h</sup>      | 2.4 <sup>g,h,i</sup>           | 63.7 <sup>a,b,c,d</sup> |
|      |            | Thawed | 40.8 <sup>c,d,e</sup> | 47.5 <sup>a,b,c,d</sup>   | 3.2 <sup>h</sup>          | 14.4 <sup>a,b,c</sup>     | 6.1 <sup>b,c,d,e,f,g,h,i</sup> | 9.6 <sup>f</sup>        |
|      | Nov        | Fresh  | 82.5 <sup>a</sup>     | 10.8 <sup>e,f,g</sup>     | 31.9 <sup>a,b,c</sup>     | 0.6 <sup>g,h</sup>        | 2.0 <sup>h,i</sup>             | 79.8 <sup>a</sup>       |
|      |            | Thawed | 38.4 <sup>d,e</sup>   | 47.5 <sup>a,b,c</sup>     | 5.4 <sup>h</sup>          | 14.6 <sup>a,b</sup>       | 9.7 <sup>a,b,c,d,e</sup>       | 12.4 <sup>f</sup>       |
|      | Dec        | Fresh  | 70.1 <sup>a,b</sup>   | 26.4 <sup>b,c,d,e,f</sup> | 29.5 <sup>a,b,c,d</sup>   | 1.5 <sup>f,g,h</sup>      | 3.8 <sup>e,f,g,h,i</sup>       | 62.8 <sup>a,b,c,d</sup> |
|      |            | Thawed | 38.3 <sup>d,e</sup>   | 59.2 <sup>a</sup>         | 4.6 <sup>h</sup>          | 17.4 <sup>a</sup>         | 9.6 <sup>a,b,c,d,e</sup>       | 8.6 <sup>f</sup>        |
| OVIX | April      | Fresh  | 72.0 <sup>a</sup>     | 23.6 <sup>d,e,f,g</sup>   | 33.7 <sup>a,b,c</sup>     | 0.9 <sup>f,g,h</sup>      | 3.6 <sup>e,f,g,h,i</sup>       | 64.4 <sup>a,b,c,d</sup> |
|      |            | Thawed | 35.5 <sup>d,e</sup>   | 60.7 <sup>a</sup>         | 4.6 <sup>h</sup>          | 10.8 <sup>a,b,c,d</sup>   | 8.4 <sup>a,b,c,d,e,f</sup>     | 12.4 <sup>f</sup>       |
|      | May        | Fresh  | 75.9 <sup>a</sup>     | 16.4 <sup>e,f,g</sup>     | 42.3 <sup>a</sup>         | 0.9 <sup>f,g,h</sup>      | 2.7 <sup>f,g,h,i</sup>         | 68.9 <sup>a,b,c</sup>   |
|      |            | Thawed | 23.7 <sup>e</sup>     | 65.5 <sup>a</sup>         | 3.8 <sup>h</sup>          | 5.6 <sup>b,c,d,e,f</sup>  | 5.5 <sup>c,d,e,f,g,h,i</sup>   | 7.4 <sup>f</sup>        |
|      | ±(Sqrt)SEM |        | ±0.33                 | ±0.41                     | ±0.19                     | ±0.31                     | ±0.23                          | ±0.38                   |

<sup>a-k</sup> different superscript letters in the same column:  $p < 0.05$ . S-EXT: semen extender; SE- semen processing; EZN- dilutor used at Estação zootécnica Nacional; OVIX- Ovixcell®; ANDR- Andromed®; Highest and lowest averaged least square means in bold.

**Table S3.** Effects of semen extender, month and thawing according to their interactions on the additional spermatozoa kinetic parameters (CASA).

| EXT        | Month | SP     | Spermatozoa              |                       |                         |                                |                         |                             |                       |                           |
|------------|-------|--------|--------------------------|-----------------------|-------------------------|--------------------------------|-------------------------|-----------------------------|-----------------------|---------------------------|
|            |       |        | VCL                      | VSL                   | VAP                     | ALH                            | LIN                     | STR                         | WOB                   | BCF                       |
| EZN        | Nov   | Fresh  | 173.6 <sup>a,b</sup>     | 58.2 <sup>a,b</sup>   | 81.0 <sup>a,b</sup>     | 3.6 <sup>a,b,c,d,e,f</sup>     | 36.0 <sup>a,b</sup>     | 76.9 <sup>a,b</sup>         | 46.5 <sup>a,b,c</sup> | 20.3 <sup>a</sup>         |
|            |       | Thawed | 142.5 <sup>b,c</sup>     | 37.5 <sup>c</sup>     | 64.2 <sup>b,c,d</sup>   | 3.1 <sup>a,b,c,d,e,f,g</sup>   | 26.4 <sup>b,c,d</sup>   | 58.6 <sup>d,e,f</sup>       | 45.3 <sup>a,b,c</sup> | 11.4 <sup>b,c,d,e,f</sup> |
|            | Dec   | Fresh  | 179.0 <sup>a,b</sup>     | 66.5 <sup>a</sup>     | 90.0 <sup>a</sup>       | 3.6 <sup>a,b,c,d,e,f</sup>     | 34.3 <sup>a,b,c</sup>   | 73.6 <sup>a,b,c,d,e</sup>   | 46.4 <sup>a,b,c</sup> | 21.9 <sup>a</sup>         |
|            |       | Thawed | 107.6 <sup>c,d,e,f</sup> | 32.2 <sup>c,d</sup>   | 53.3 <sup>d,e,f</sup>   | 2.6 <sup>a,b,c,d,e,f,g,h</sup> | 29.3 <sup>a,b,c,d</sup> | 59.4 <sup>c,d,e,f</sup>     | 45.8 <sup>a,b,c</sup> | 10.9 <sup>c,d,e,f</sup>   |
|            | April | Fresh  | 175.7 <sup>a,b</sup>     | 66.3 <sup>a</sup>     | 86.2 <sup>a,b</sup>     | 3.4 <sup>a,b,c,d,e,f</sup>     | 37.6 <sup>a</sup>       | 76.4 <sup>a,b,d</sup>       | 48.9 <sup>a,b</sup>   | 19.1 <sup>a,b,c</sup>     |
|            |       | Thawed | 116.2 <sup>c,d</sup>     | 38.9 <sup>c</sup>     | 56.8 <sup>c,d,e</sup>   | 2.7 <sup>a,b,c,d,e,f,g,h</sup> | 32.9 <sup>a,b,c,d</sup> | 67.2 <sup>a,b,c,d,e,f</sup> | 48.5 <sup>a,b</sup>   | 15.2 <sup>a,b,c,d</sup>   |
|            | May   | Fresh  | 211.3 <sup>a</sup>       | 75.8 <sup>a</sup>     | 99.3 <sup>a</sup>       | 3.8 <sup>a,b,c,d,e,f</sup>     | 35.9 <sup>a,b</sup>     | 76.8 <sup>a,b</sup>         | 46.7 <sup>a,b,c</sup> | 19.9 <sup>a,b</sup>       |
|            |       | Thawed | 114.3 <sup>c,d,e</sup>   | 40.9 <sup>b,c</sup>   | 58.2 <sup>c,d</sup>     | 2.6 <sup>a,b,c,d,e,f,g,h</sup> | 35.5 <sup>a,b</sup>     | 69.6 <sup>a,b,c,d,e,f</sup> | 51.0 <sup>a,b</sup>   | 16.8 <sup>a,b,c</sup>     |
| ANDR       | Nov   | Fresh  | 213.4 <sup>a,b</sup>     | 62.3 <sup>a</sup>     | 89.4 <sup>a,b</sup>     | 4.2 <sup>a</sup>               | 29.7 <sup>a,b,c,d</sup> | 69.9 <sup>a,b,c,d,e</sup>   | 42.4 <sup>b,c</sup>   | 14.1 <sup>a,b,c,d,e</sup> |
|            |       | Thawed | 70.5 <sup>d,e,f,g</sup>  | 21.2 <sup>d,e</sup>   | 34.7 <sup>f,g,h</sup>   | 2.2 <sup>d,e,f,g,h</sup>       | 30.1 <sup>a,b,c,d</sup> | 61.2 <sup>a,b,c,d,e,f</sup> | 49.1 <sup>a,b</sup>   | 6.1 <sup>f,g</sup>        |
|            | Dec   | Fresh  | 194.2 <sup>a,b</sup>     | 60.8 <sup>a</sup>     | 86.4 <sup>a,b</sup>     | 4.1 <sup>a</sup>               | 30.3 <sup>a,b,c,d</sup> | 70.3 <sup>a,b,c,d,e</sup>   | 43.0 <sup>a,b,c</sup> | 17.4 <sup>a,b,c</sup>     |
|            |       | Thawed | 70.4 <sup>d,e,f,g</sup>  | 20.8 <sup>d,e</sup>   | 34.9 <sup>f,g,h</sup>   | 2.4 <sup>b,c,d,e,f,g,h</sup>   | 30.1 <sup>a,b,c,d</sup> | 59.3 <sup>b,c,d,e,f</sup>   | 50.6 <sup>a,b</sup>   | 7.5 <sup>d,e,f,g</sup>    |
|            | April | Fresh  | 185.5 <sup>a,b</sup>     | 60.9 <sup>a</sup>     | 83.4 <sup>a,b,c</sup>   | 3.5 <sup>a,b,c,d,e</sup>       | 32.9 <sup>a,b,c,d</sup> | 73.2 <sup>a,b,c,d,e</sup>   | 44.7 <sup>a,b,c</sup> | 19.1 <sup>a,b,c</sup>     |
|            |       | Thawed | 94.2 <sup>c,d,e,f</sup>  | 25.0 <sup>c,d,e</sup> | 56.2 <sup>d,e,f,g</sup> | 1.9 <sup>f,g,h</sup>           | 26.5 <sup>b,c,d</sup>   | 53.4 <sup>f,g</sup>         | 49.8 <sup>a,b</sup>   | 5.7 <sup>f,g</sup>        |
|            | May   | Fresh  | 198.3 <sup>a,b</sup>     | 64.9 <sup>a</sup>     | 90.1 <sup>a,b</sup>     | 3.9 <sup>a,b,c</sup>           | 32.1 <sup>a,b,c,d</sup> | 71.5 <sup>a,b,c,d,e</sup>   | 45.0 <sup>a,b,c</sup> | 17.8 <sup>a,b,c</sup>     |
|            |       | Thawed | 65.8 <sup>d,e,f,g</sup>  | 21.6 <sup>d,e</sup>   | 34.8 <sup>f,g,h</sup>   | 0.8 <sup>h,i</sup>             | 34.6 <sup>a,b,c</sup>   | 62.2 <sup>a,b,c,d,e,f</sup> | 55.1 <sup>a</sup>     | 3.3 <sup>g</sup>          |
| OVIX       | Nov   | Fresh  | 214.2 <sup>a</sup>       | 66.7 <sup>a</sup>     | 96.1 <sup>a</sup>       | 3.7 <sup>a,b,d,f</sup>         | 31.0 <sup>a,b,c,d</sup> | 69.8 <sup>a,b,c,d,e,f</sup> | 44.2 <sup>a,b,c</sup> | 20.6 <sup>a,b</sup>       |
|            |       | Thawed | 64.2 <sup>e,f,g</sup>    | 20.2 <sup>d,e</sup>   | 33.2 <sup>f,g,h</sup>   | 1.9 <sup>e,g,h,i</sup>         | 32.0 <sup>a,b,c,d</sup> | 60.6 <sup>d,e,f</sup>       | 52.3 <sup>a,b</sup>   | 6.6 <sup>f,g</sup>        |
|            | Dec   | Fresh  | 192.7 <sup>a,b</sup>     | 66.8 <sup>a</sup>     | 89.7 <sup>a,b</sup>     | 3.4 <sup>a,b,c,d,f</sup>       | 34.2 <sup>a,b,c</sup>   | 75.0 <sup>a,b,c,d</sup>     | 46.2 <sup>a,b</sup>   | 21.5 <sup>a</sup>         |
|            |       | Thawed | 60.2 <sup>f,g</sup>      | 18.7 <sup>d,e</sup>   | 31.0 <sup>g,h</sup>     | 2.1 <sup>c,e,g,h,i</sup>       | 31.8 <sup>a,b,c,d</sup> | 60.7 <sup>b,c,d,e,f</sup>   | 52.1 <sup>a,b</sup>   | 7.1 <sup>e,f,g</sup>      |
|            | April | Fresh  | 182.2 <sup>a,b</sup>     | 66.8 <sup>a</sup>     | 86.9 <sup>a,b</sup>     | 3.1 <sup>a,b,c,d,e,f</sup>     | 36.0 <sup>a,b</sup>     | 75.7 <sup>a,b,c,d</sup>     | 47.4 <sup>a,b</sup>   | 20.6 <sup>a,b</sup>       |
|            |       | Thawed | 79.8 <sup>d,e,f</sup>    | 19.6 <sup>d,e</sup>   | 35.0 <sup>e,f,g,h</sup> | 1.5 <sup>g,h,i</sup>           | 25.2 <sup>c,d</sup>     | 56.0 <sup>e,f,g</sup>       | 44.5 <sup>a,b,c</sup> | 7.0 <sup>e,f,g</sup>      |
|            | May   | Fresh  | 196.5 <sup>a,b</sup>     | 77.0 <sup>a</sup>     | 96.1 <sup>a</sup>       | 3.3 <sup>a,b,c,d,f</sup>       | 38.4 <sup>a</sup>       | 79.1 <sup>a</sup>           | 48.3 <sup>a,b</sup>   | 19.4 <sup>a,b,c</sup>     |
|            |       | Thawed | 44.0 <sup>g</sup>        | 15.6 <sup>e</sup>     | 23.4 <sup>h</sup>       | 1.1 <sup>h,i</sup>             | 23.4 <sup>d</sup>       | 42.2 <sup>g</sup>           | 39.9 <sup>c</sup>     | 4.2 <sup>g</sup>          |
| ±(Sqrt)SEM |       |        | ±0.52                    | ±0.27                 | ±0.31                   | ±0.12                          | ±0.18                   | ±0.21                       | ±0.19                 | ±0.23                     |

<sup>a-k</sup> different superscript letters in the same column:  $p < 0.05$ . S-EXT: semen extender; SE- semen processing; EZN- Estação Zootécnica Nacional; OVIX- Ovixcell®; ANDR- Andromed®; VCL- Curvilinear velocity ( $\mu\text{m}/\text{sec}$ ); VSL-Straight-line velocity ( $\mu\text{m}/\text{sec}$ ); VAP- Average-path velocity ( $\mu\text{m}/\text{sec}$ ); ALH- Amplitude of lateral head displacement ( $\mu\text{m}$ ); LIN- Linearity (%); STR- Straightness (%); WOB- Wobble (%); BCF- Beat cross frequency (Hz). Highest and lowest averaged least square means in bold.
